# Supplementary material for: Highly sensitive oxygen sensors based on Cu(i) complex–polystyrene composite nanofibrous membranes prepared by electrospinning
Source: Royal Society of Chemistry journal article supplement (doi:10.1039/b910305h), 2009-01-01
Supplement: b910305h.pdf [file b910305h.pdf]

# Highly Sensitive Oxygen Sensors Based on Cu(I) Complex/Polystyrene Composite Nanofibrous Membranes by Preparing Electrospinning

*Yinghui Wang,<sup>a, b</sup> Bin Li, \*<sup>a</sup> Yanhong Liu,<sup>a, b</sup> Liming Zhang,<sup>a, b</sup> Qinghui Zuo,<sup>a, b</sup>*

*Linfang Shi,<sup>a, b</sup> Zhongmin Su \*<sup>c</sup>*

<sup>a</sup>Key Laboratory of Excited State Processes, Changchun Institute of Optics, Fine Mechanics and Physics, Chinese Academy of Sciences, Changchun, 130033, P. R. China.

<sup>b</sup>Graduate School of the Chinese Academy of Sciences, Chinese Academy of Sciences, Beijing, 100039, P. R. China.

<sup>c</sup>Department of Chemistry, Northeast Normal University, Changchun 130024, P. R. China.

## Supporting Information

**Fig. S1.** UV-vis absorption spectra for (a) PS, (b) [Cu(POP)phencarz]BF<sub>4</sub> and (c) sample B in solid.

**Fig. S2.** UV-vis absorption spectra for (A) [Cu(POP)phencarz]BF<sub>4</sub>, (B) ligand phencarz and (C) ligand POP in CH<sub>2</sub>Cl<sub>2</sub> solution.

**Fig. S3.** Emission spectra of sample A, C and D under different oxygen concentrations.  $\lambda_{\text{ex}} = 365 \text{ nm}$ .

**Fig. S4.** Response time and relative intensity change of sample B to alternate environments of 100% nitrogen and 100% oxygen.

**Fig. S5.** Emission spectra of continuous thin films preparing by different methods (a) spin coating, (b) dip coating and (c) casting under different oxygen concentrations.  $\lambda_{\text{ex}} = 365 \text{ nm}$ .

**Table S1:** The response/recovery time of the [Cu(POP)phencarz]BF<sub>4</sub>/PS composite nanofibrous membranes.

**Table S2:** The lifetimes of [Cu(POP)phencarz]BF<sub>4</sub> in thin films and in solution.

#### **The procedure for electrospinning composite nanofibers.**

An appropriate amount of PS ( $M_w = 100\ 000$ ) was dissolved in *N,N*-dimethylformamide (DMF) at a concentration of 22 wt % at room temperature. After vigorous stirring, different amount of [Cu(POP)phencarz]BF<sub>4</sub> (1, 1.5, 2 and 3 wt % [Cu(POP)phencarz]BF<sub>4</sub> relative to PS) were added into the solution. Then the solution was put into a glass syringe and electrospun by applying 16 kV at an electrode distance of 16 cm. The fibers were collected on an aluminum frame.

#### **The method for measuring the oxygen sensing properties of samples.**

The oxygen sensing properties based on luminescence intensity quenching of the obtained samples were characterized using a Hitachi-4500 fluorescence spectrophotometer equipped with a xenon lamp (150 W) operating in the 200-900 nm range. The emission spectra of different samples were obtained under excitation wavelength at 365 nm. For the Stern-Volmer plots measurements, oxygen and nitrogen were mixed at different concentrations via gas-flow controllers and flowed

directly into the gas chamber sealed with a close fitting suba-seal rubber lid equipped with two (in and out) tubes. We typically allowed 1 min between changes in the N<sub>2</sub>/O<sub>2</sub> concentrations to ensure that a new equilibrium point had been established. Equilibrium was evident when the luminescence intensity remained constant ( $\pm 2\%$ ). The sensing response curves were obtained using the same instruments.

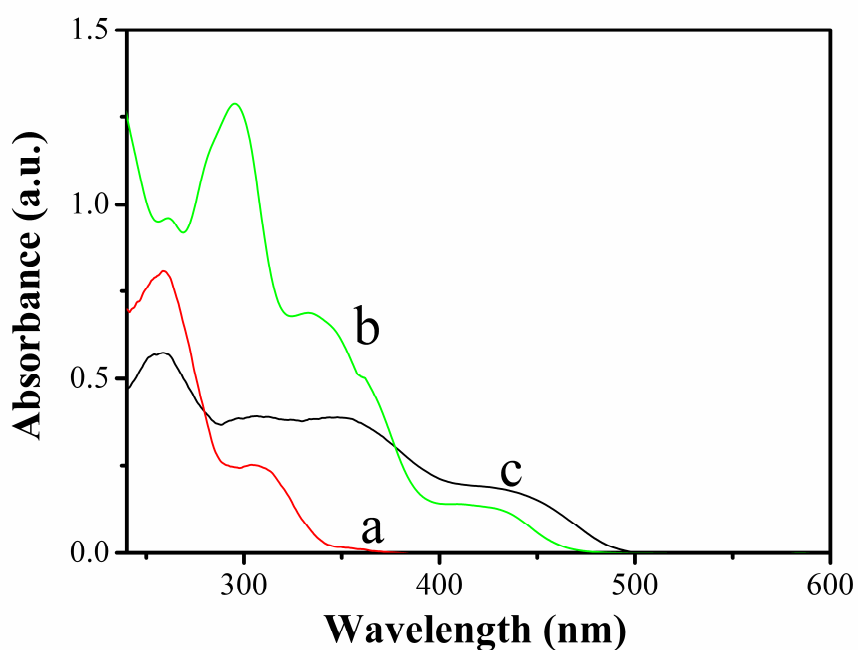

**Fig. S1.** UV-vis absorption spectra for (a) PS, (b) [Cu(POP)phencarz]BF<sub>4</sub>, and (c) sample B in solid.

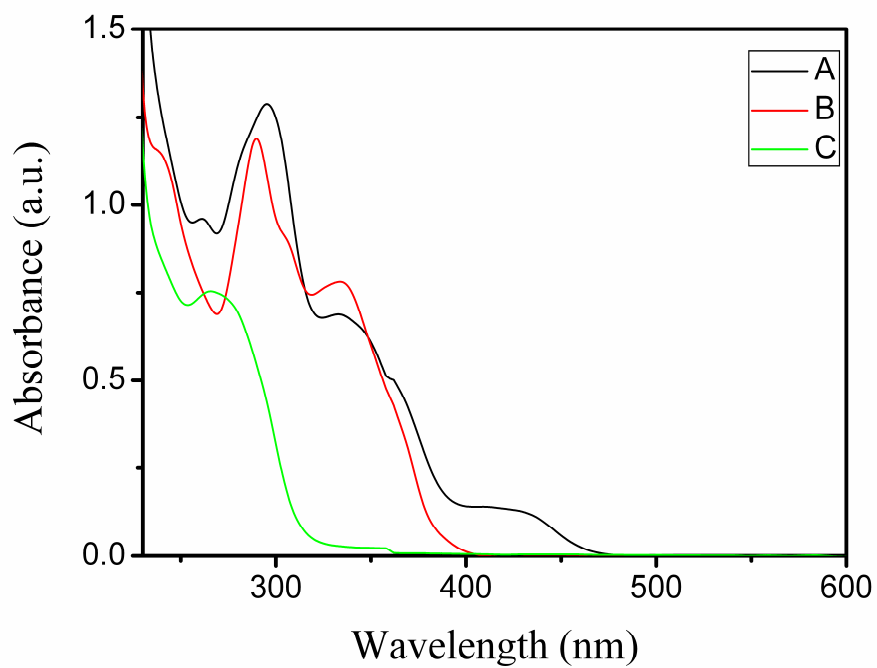

**Fig. S2.** UV-vis absorption spectra for (A)  $[\text{Cu}(\text{POP})\text{phencarz}]\text{BF}_4$ , (B) ligand phencarz and (C) ligand POP in  $\text{CH}_2\text{Cl}_2$  solution.

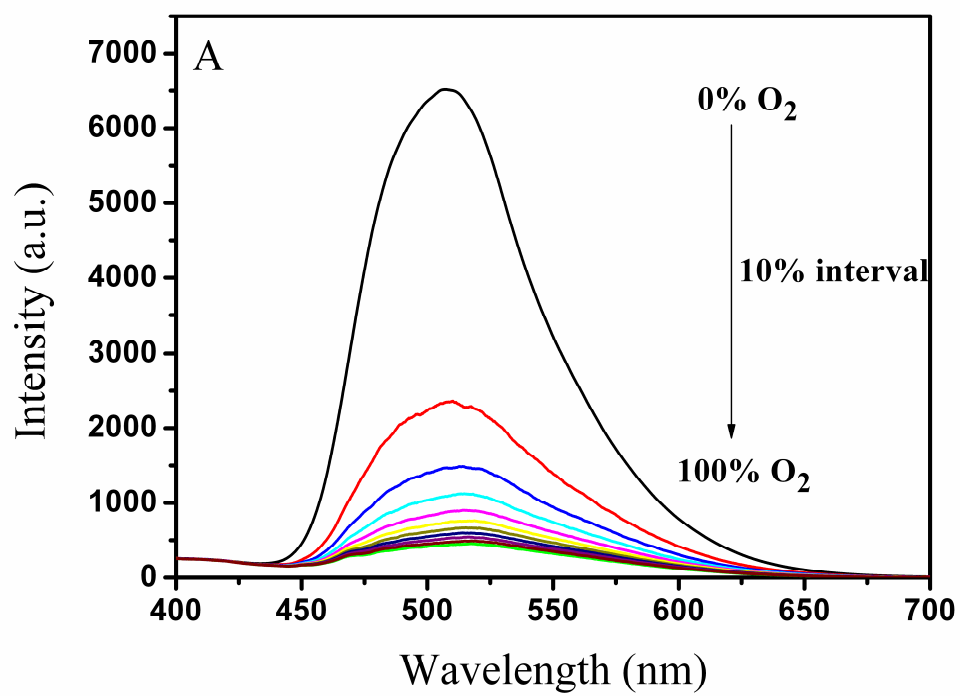

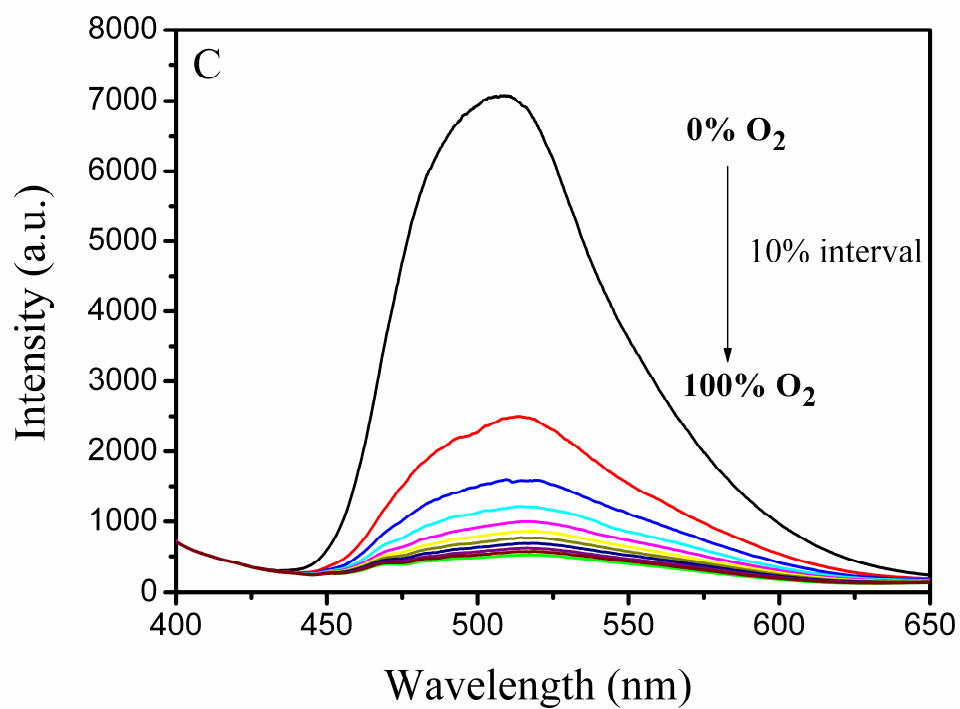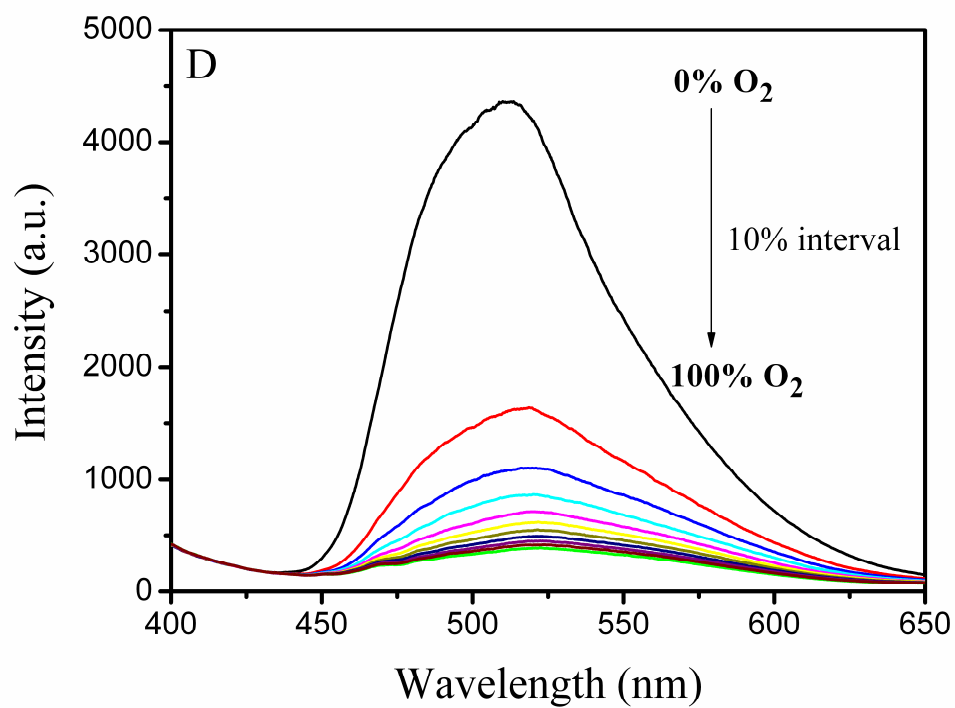

**Fig. S3.** Emission spectra of sample A, C and D under different oxygen concentrations.  $\lambda_{\text{ex}} = 365 \text{ nm}$ .

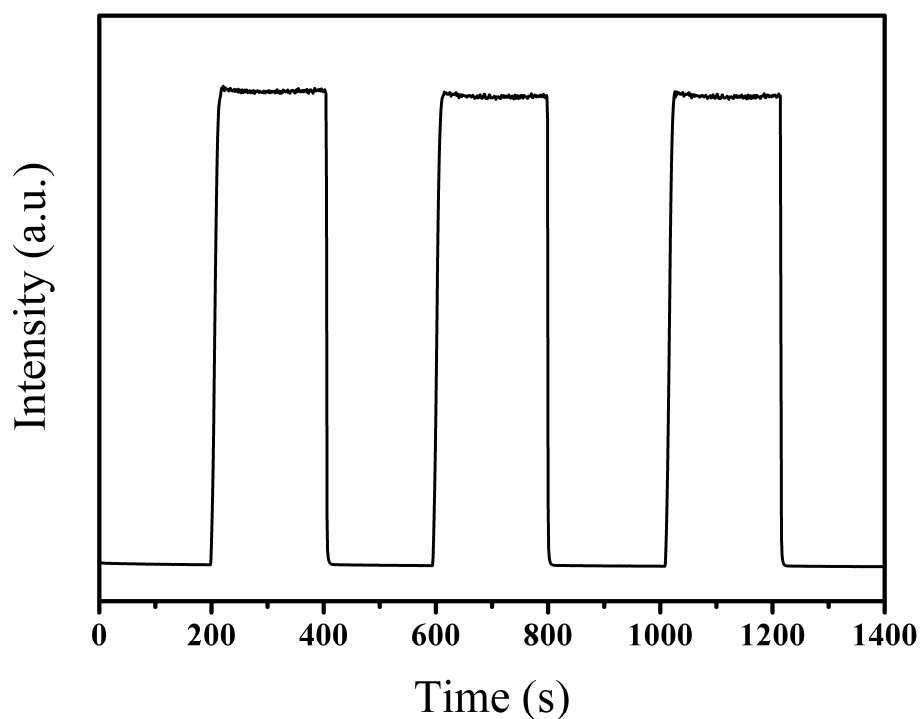

**Fig. S4.** Response time and relative intensity change of sample B to alternate environments of 100% nitrogen and 100% oxygen.

**Table S1:** The response/recovery time of the [Cu(POP)phencarz]BF<sub>4</sub>/PS composite nanofibrous membranes.

| sample               | A  | B  | C  | D  |
|----------------------|----|----|----|----|
| $t_{\downarrow}$ (s) | 8  | 7  | 8  | 9  |
| $t_{\uparrow}$ (s)   | 14 | 14 | 14 | 14 |

For an oxygen sensor, short response and recovery time are very important factors in evaluating its feasibility of practical application. Generally, 95% response time, i.e.,  $t_{\downarrow}$  (95%, N<sub>2</sub>→O<sub>2</sub>), is defined as the time required for the luminescent intensity to decrease by 95% on changing from 100% N<sub>2</sub> to 100% O<sub>2</sub>. Similarly, 95% recovery

time, i.e.,  $t_{\uparrow}$  (95%,  $O_2 \rightarrow N_2$ ), means the time required for the luminescence intensity to reach the 95% of its initial value recorded under 100%  $N_2$  on changing from 100%  $O_2$  to 100%  $N_2$ . Fig.S4. shows the response property of sample B. Upon changing to pure  $O_2$ , the emission intensity of the samples drops very quickly, and increases and recovers to its initial value while upon changing to pure  $N_2$ . Although the samples are repeatedly exposed to an alternating atmosphere of nitrogen and oxygen, the sensors response are still stable and reversible. The response time  $t_{\downarrow}$  and recovery time  $t_{\uparrow}$  of sample B are 7s and 14s, respectively. To our knowledge, it is the shortest recovery time for oxygen sensors based on luminescent Cu(I) complexes. We ascribe the fast response and recovery to the fact that the porous structure of the electrospun membranes facilitates the high diffusion of oxygen.

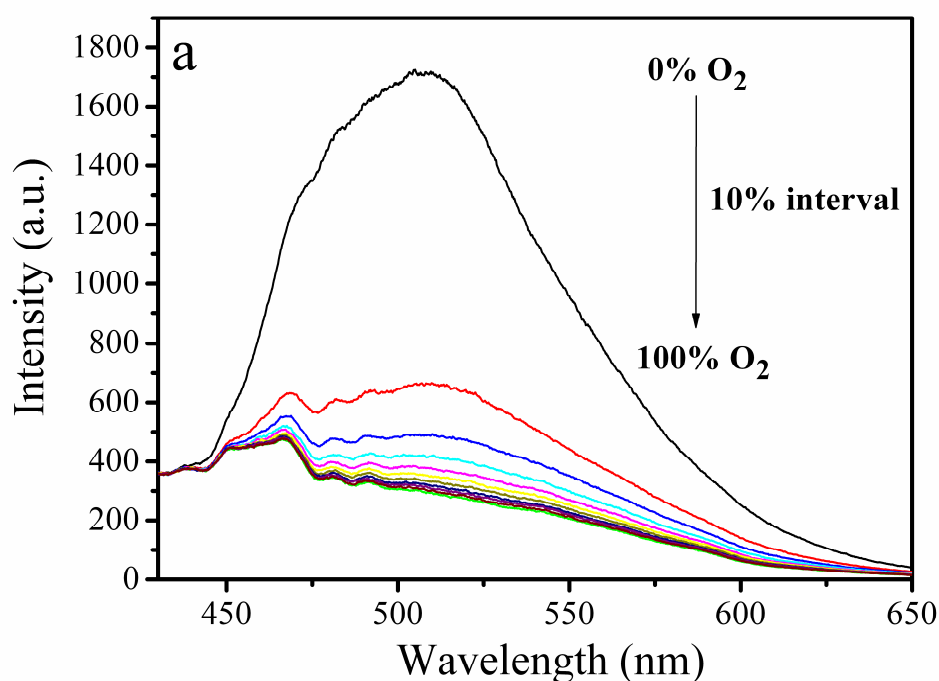

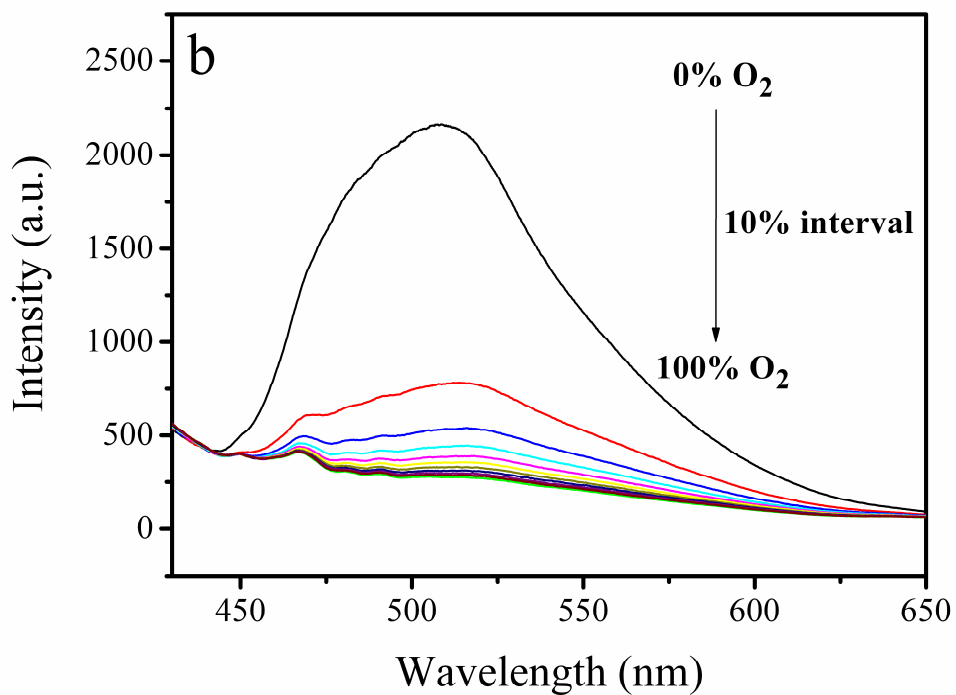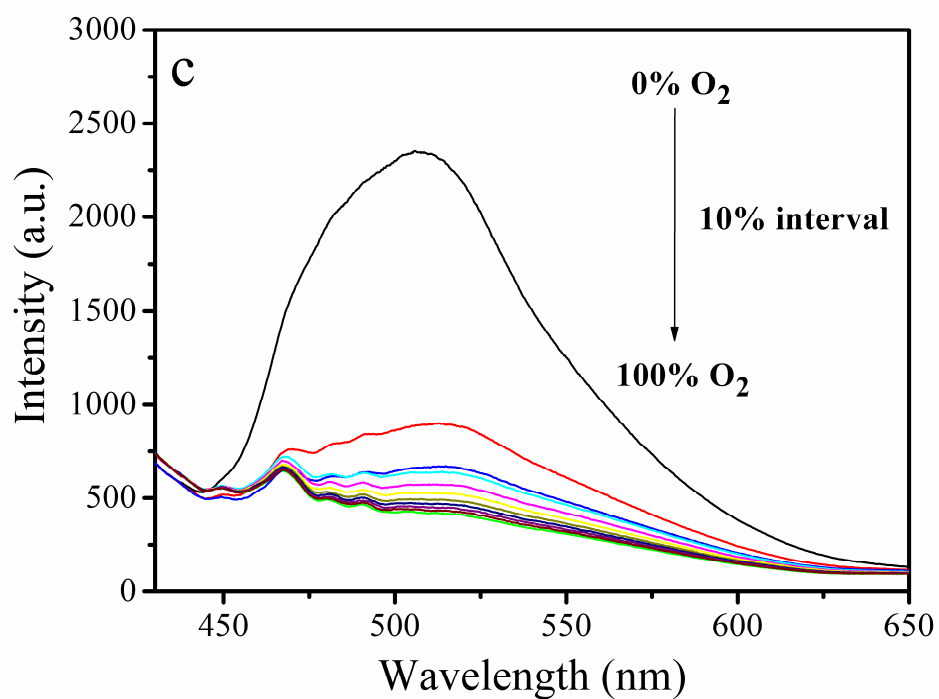

**Fig. S5.** Emission spectra of continuous thin films preparing by different methods (a) spin coating, (b) dip coating and (c) casting under different oxygen concentrations.  $\lambda_{\text{ex}}$

= 365 nm.



**Table S2:** The lifetimes of [Cu(POP)phencarz]BF<sub>4</sub> in thin films and in solution.

| samples       | In thin film |             |         | In solution |
|---------------|--------------|-------------|---------|-------------|
|               | spin coating | dip coating | casting | solution    |
| lifetime (μs) | 8.14         | 9.21        | 8.43    | 0.37        |
